# Supplementary material for: Comparative genomics of bacteria from amphibian skin associated with inhibition of an amphibian fungal pathogen, Batrachochytrium dendrobatidis
Source: PeerJ journal article supplement (doi:10.7717/peerj.15714), 2023-08-22
Supplement: FigureS2.pdf [file FigureS2.pdf]

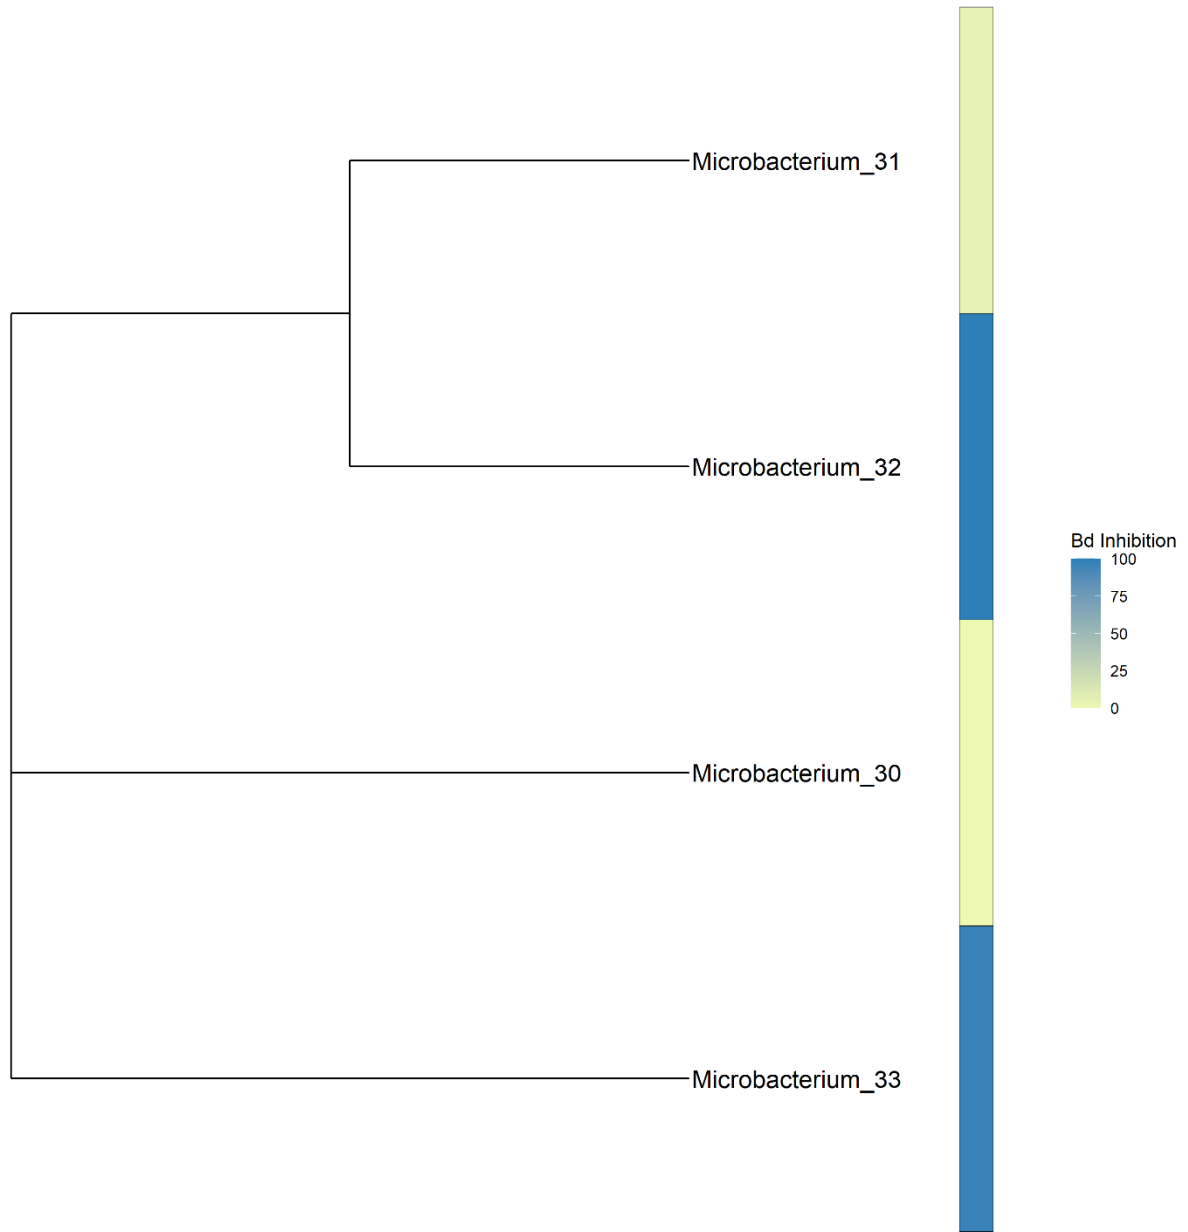

Fig. S2 Phylogenetic tree constructed from the two genes that our four *Microbacterium* isolates shared within their predicted Type III polyketide synthase cluster. These *Microbacterium* isolates were isolated from amphibian skin. Bd inhibition values were obtained from in vitro challenge assays (Walke et al. 2017). The inhibition values refer to the mean inhibition. 100 = complete Bd inhibition (blue), 0 = no inhibition (yellow). For the purposes of this figure, isolates with negative scores indicating potential facilitation of growth (N=1) were set at zero. Isolates are labeled with genus and sequencing ID number. (Table S3)
