# Supplementary material for: Comparative genomics of bacteria from amphibian skin associated with inhibition of an amphibian fungal pathogen, Batrachochytrium dendrobatidis
Source: PeerJ journal article supplement (doi:10.7717/peerj.15714), 2023-08-22
Supplement: FigureS3.pdf [file FigureS3.pdf]

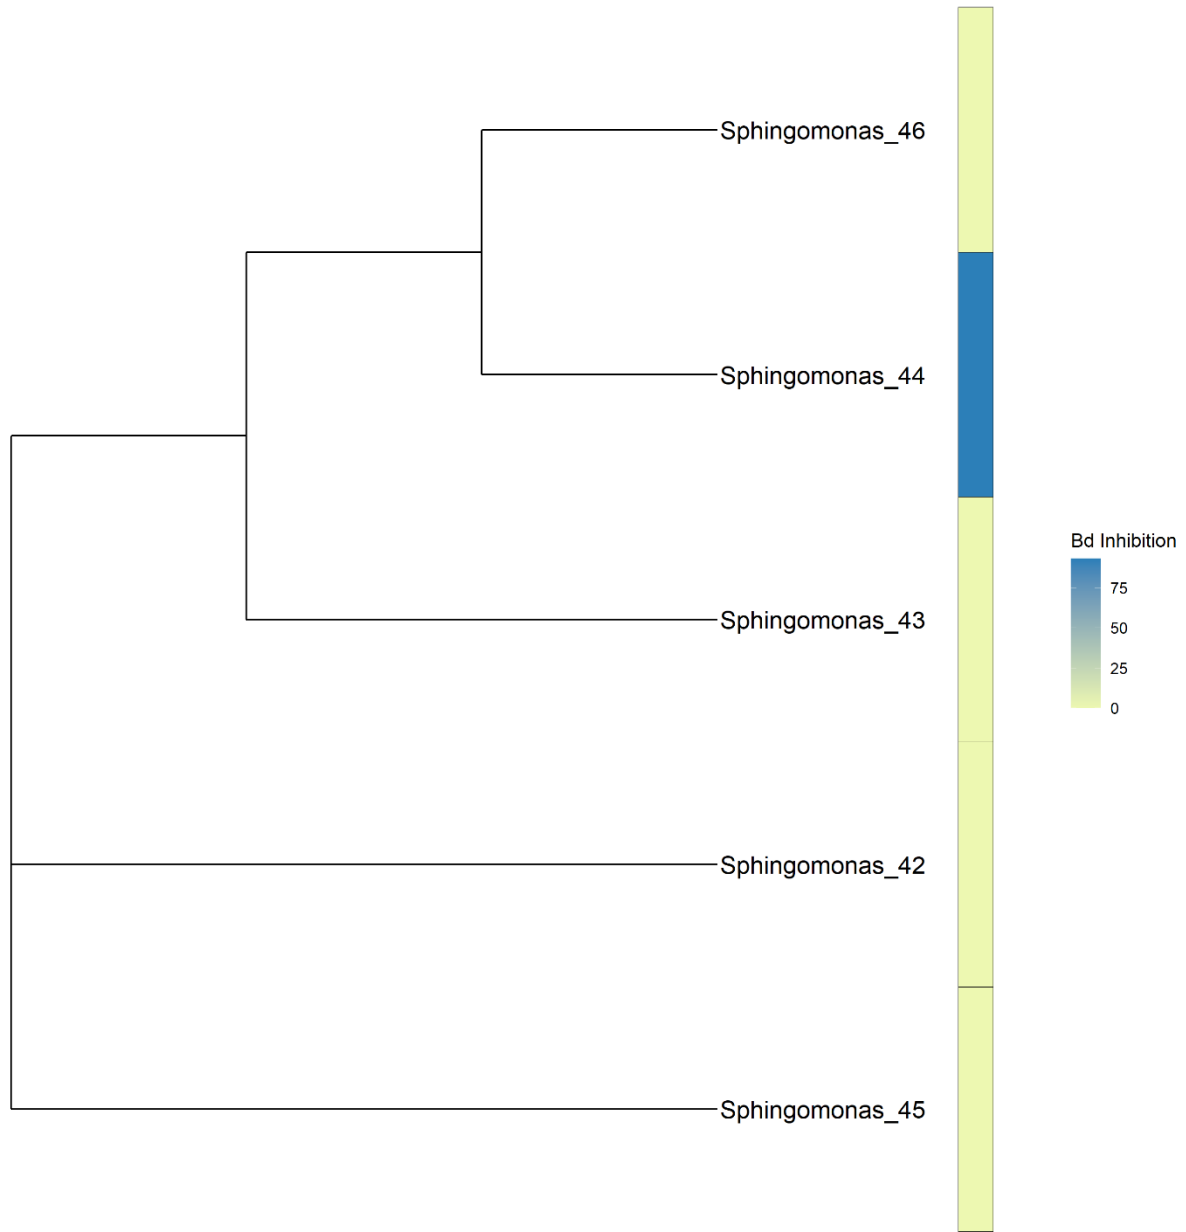

Fig. S3 Phylogenetic tree constructed from the eight genes that our five *Sphingomonas* isolates shared within their predicted Type III polyketide synthase cluster. These *Sphingomonas* isolates were isolated from amphibian skin. Bd inhibition values were obtained from in vitro challenge assays (Walke et al. 2017). The inhibition values refer to the mean inhibition. 100 = complete Bd inhibition (blue), 0 = no inhibition (yellow). For the purposes of this figure, isolates with negative scores indicating potential facilitation of growth (N=4) were set at zero. Isolates are labeled with genus and sequencing ID number. (Table S3)
