# Supplementary material for: Comparative genomics of bacteria from amphibian skin associated with inhibition of an amphibian fungal pathogen, Batrachochytrium dendrobatidis
Source: PeerJ journal article supplement (doi:10.7717/peerj.15714), 2023-08-22
Supplement: Supplemental_Table_1.pdf [file Supplemental_Table_1.pdf]

Supplemental Table 1: Information regarding raw Illumina reads. The first two columns of the table contain the sequencing ID of each isolate, the number of base pairs and number of clusters that passed Illumina's internal quality filtering procedure PF yield and number of PF clusters respectively. The other two columns contain the percentage of reads that had a Phred quality score above 30 (Q30%) and the average quality score of the raw reads.

| <b>Sequencing ID</b> | <b>PF* Yield (bp)</b> | <b>Number of PF* Clusters**</b> | <b>Q30%</b> | <b>Average Quality Score</b> |
|----------------------|-----------------------|---------------------------------|-------------|------------------------------|
| LB-S02               | 1,952,360,238         | 6,464,769                       | 91.33       | 38.14                        |
| LB-S04               | 1,954,006,440         | 6,470,220                       | 91.3        | 38.13                        |
| LB-S05               | 1,709,751,558         | 5,661,429                       | 91.7        | 38.23                        |
| LB-S06               | 1,782,628,386         | 5,902,743                       | 91.68       | 38.23                        |
| LB-S07               | 1,715,350,940         | 5,679,970                       | 91.46       | 38.17                        |
| LB-S08               | 1,681,662,538         | 5,568,419                       | 91.77       | 38.25                        |
| LB-S09               | 2,140,794,346         | 7,088,723                       | 90.84       | 38                           |
| LB-S10               | 2,250,450,848         | 7,451,824                       | 90.81       | 37.99                        |
| LB-S11               | 2,031,885,294         | 6,728,097                       | 90.86       | 38.01                        |
| LB-S12               | 1,982,936,530         | 6,566,015                       | 91.09       | 38.07                        |
| LB-S13               | 2,086,145,634         | 6,907,767                       | 91.21       | 38.11                        |
| LB-S14               | 2,012,697,120         | 6,664,560                       | 91.17       | 38.1                         |
| LB-S15               | 2,096,819,522         | 6,943,111                       | 91.14       | 38.08                        |
| LB-S16               | 2,047,650,600         | 6,780,300                       | 91.38       | 38.15                        |
| LB-S20               | 2,138,597,598         | 7,081,449                       | 90.07       | 37.81                        |
| LB-S21               | 2,314,181,606         | 7,662,853                       | 90.25       | 37.85                        |
| LB-S22               | 2,313,662,166         | 7,661,133                       | 90.55       | 37.94                        |
| LB-S23               | 2,261,351,538         | 7,487,919                       | 90.34       | 37.88                        |
| LB-S27               | 1,991,684,564         | 6,594,982                       | 88.79       | 37.45                        |
| LB-S28               | 2,049,137,044         | 6,785,222                       | 89.03       | 37.51                        |
| LB-S29               | 2,040,933,818         | 6,758,059                       | 88.94       | 37.49                        |
| LB-S30               | 2,156,068,298         | 7,139,299                       | 87.97       | 37.21                        |

|        |               |           |       |       |
|--------|---------------|-----------|-------|-------|
| LB-S31 | 2,112,098,910 | 6,993,705 | 87.49 | 37.08 |
| LB-S32 | 2,123,267,776 | 7,030,688 | 88.35 | 37.32 |
| LB-S33 | 2,618,246,078 | 8,669,689 | 89.02 | 37.51 |
| LB-S34 | 2,191,960,696 | 7,258,148 | 90.48 | 37.9  |
| LB-S35 | 2,112,356,214 | 6,994,557 | 90.63 | 37.94 |
| LB-S36 | 2,100,396,108 | 6,954,954 | 91.19 | 38.09 |
| LB-S37 | 2,206,094,900 | 7,304,950 | 91.06 | 38.06 |
| LB-S38 | 1,961,188,302 | 6,494,001 | 91.03 | 38.05 |
| LB-S39 | 2,297,436,008 | 7,607,404 | 90.1  | 37.81 |
| LB-S41 | 2,250,771,572 | 7,452,886 | 90.49 | 37.91 |
| LB-S42 | 2,603,546,832 | 8,621,016 | 89.11 | 37.53 |
| LB-S43 | 2,408,450,906 | 7,975,003 | 89.6  | 37.67 |
| LB-S44 | 2,488,300,008 | 8,239,404 | 89.26 | 37.58 |
| LB-S45 | 2,666,098,280 | 8,828,140 | 89.35 | 37.6  |
| LB-S46 | 2,696,225,800 | 8,927,900 | 89.32 | 37.59 |
| LB-S47 | 2,618,102,628 | 8,669,214 | 89.71 | 37.7  |
| LB-S48 | 2,451,845,588 | 8,118,694 | 89.4  | 37.62 |
| LB-S50 | 2,230,779,776 | 7,386,688 | 88.58 | 37.4  |
