# Supplementary material for: Comparative genomics of bacteria from amphibian skin associated with inhibition of an amphibian fungal pathogen, Batrachochytrium dendrobatidis
Source: PeerJ journal article supplement (doi:10.7717/peerj.15714), 2023-08-22
Supplement: Supplemental_Table_2.pdf [file Supplemental_Table_2.pdf]

Supplemental Table 2: Assembly statistics of whole bacterial genomes. The first four columns contain the bacterial genus/sequencing ID, how many contigs make up each genome (# contigs), the length in base pairs of the longest contig (Largest contig), and how many base pairs each genome contains (total length). The next five columns contain the percentage of each genome made up of G/C nucleotides (GC%), the length of the shortest contig that contains at least 50 or 75% of the genome (N50/N75) and the number of contigs that are needed to cover at least 50 or 75% of the genome (L50/L75). The final column contains the number of uncalled bases per 100 kilobase pairs (# N's per 100 kbp).

| <b>Bacterial genus<br/>(Sample<br/>ID/Sequencing ID)</b> | <b>#<br/>contigs</b> | <b>Largest<br/>contig</b> | <b>Total<br/>length</b> | <b>GC<br/>(%)</b> | <b>N50</b> | <b>N75</b> | <b>L50</b> | <b>L75</b> | <b># N's<br/>per<br/>100<br/>kbp</b> |
|----------------------------------------------------------|----------------------|---------------------------|-------------------------|-------------------|------------|------------|------------|------------|--------------------------------------|
| <i>Agrobacterium</i><br>(HP11E/LB-S02)                   | 56                   | 688558                    | 4680142                 | 56.67             | 349712     | 166753     | 5          | 10         | 0                                    |
| <i>Agrobacterium</i><br>(HP5J1/LB-S04)                   | 45                   | 1074136                   | 4676747                 | 56.69             | 348513     | 309462     | 4          | 7          | 0                                    |
| <i>Bacillus</i><br>(CC6U/LB-S05)                         | 81                   | 1258992                   | 6117020                 | 37.4              | 1104946    | 113546     | 3          | 8          | 0                                    |
| <i>Bacillus</i><br>(HP5F1/LB-S06)                        | 119                  | 445015                    | 5627244                 | 39.92             | 174213     | 85551      | 11         | 24         | 0                                    |
| <i>Bacillus</i><br>(HP5K2/LB-S07)                        | 120                  | 445015                    | 5628740                 | 39.92             | 153687     | 84098      | 11         | 25         | 0                                    |
| <i>Bacillus</i><br>(PRE21G/LB-S08)                       | 113                  | 1201680                   | 6065909                 | 37.44             | 918518     | 157784     | 3          | 7          | 0                                    |
| <i>Flavobacterium</i><br>(CC8A2/LB-S09)                  | 54                   | 563445                    | 5325413                 | 34.01             | 286538     | 141230     | 7          | 13         | 0                                    |
| <i>Flavobacterium</i><br>(HP3BB/LB-S10)                  | 30                   | 509329                    | 4813557                 | 33.78             | 365929     | 171784     | 6          | 11         | 0                                    |
| <i>Flavobacterium</i><br>(HP3M/LB-S11)                   | 29                   | 509329                    | 4813597                 | 33.78             | 365927     | 171784     | 6          | 11         | 0                                    |
| <i>Hafnia</i><br>(BFE23D/LB-S12)                         | 70                   | 466616                    | 4734883                 | 48.12             | 168785     | 100233     | 9          | 18         | 0                                    |

|                                             |     |         |         |       |        |        |    |    |   |
|---------------------------------------------|-----|---------|---------|-------|--------|--------|----|----|---|
| <i>Hafnia</i><br>(BFE501/LB-S13)            | 112 | 586722  | 5025182 | 47.89 | 180877 | 92853  | 7  | 18 | 0 |
| <i>Hafnia</i><br>(PRE11D1/LB-S14)           | 124 | 538032  | 5022383 | 47.98 | 220892 | 79099  | 7  | 18 | 0 |
| <i>Hafnia</i><br>(PRE7B/LB-S15)             | 123 | 538032  | 5022734 | 47.98 | 220892 | 79527  | 7  | 18 | 0 |
| <i>Hafnia</i><br>(PRE7G/LB-S16)             | 123 | 538032  | 5022717 | 47.98 | 220892 | 79527  | 7  | 18 | 0 |
| <i>Janthinobacterium</i><br>(CC11P/LB-S20)  | 68  | 1028192 | 6299659 | 63.1  | 448274 | 281560 | 5  | 10 | 0 |
| <i>Janthinobacterium</i><br>(CC130/LB-S21)  | 211 | 284967  | 7734570 | 65.34 | 121673 | 68881  | 22 | 43 | 0 |
| <i>Janthinobacterium</i><br>(HP12P2/LB-S22) | 82  | 822193  | 6045046 | 62.61 | 296923 | 136953 | 6  | 14 | 0 |
| <i>Janthinobacterium</i><br>(CC14D/LB-S23)  | 45  | 1336112 | 6263012 | 63.09 | 587332 | 275417 | 4  | 7  | 0 |
| <i>Massilia</i><br>(HP1M/LB-S27)            | 63  | 1061463 | 5742643 | 63.18 | 420963 | 226562 | 4  | 9  | 0 |
| <i>Massilia</i><br>(HP4P/LB-S28)            | 40  | 794939  | 5160980 | 64.14 | 274418 | 157776 | 6  | 12 | 0 |
| <i>Massilia</i><br>(HP6N/LB-S29)            | 44  | 726155  | 5491525 | 63.59 | 220857 | 179845 | 6  | 13 | 0 |
| <i>Microbacterium</i><br>(CC8G/LB-S30)      | 11  | 903157  | 3750929 | 68.3  | 844452 | 601843 | 3  | 4  | 0 |
| <i>Microbacterium</i><br>(CC3Q/LB-S31)      | 14  | 970861  | 3658083 | 69.98 | 543564 | 401990 | 3  | 5  | 0 |
| <i>Microbacterium</i><br>(HP3T/LB-S32)      | 14  | 635353  | 2846619 | 69.4  | 418522 | 337690 | 3  | 5  | 0 |
| <i>Microbacterium</i><br>(HP4V/LB-S33)      | 26  | 756650  | 3854063 | 68.94 | 435233 | 299231 | 4  | 6  | 0 |
| <i>Pedobacter</i><br>(HP10H/LB-S34)         | 118 | 1207930 | 7729651 | 41.75 | 306829 | 195337 | 6  | 14 | 0 |

|                                           |     |         |         |       |        |        |    |    |   |
|-------------------------------------------|-----|---------|---------|-------|--------|--------|----|----|---|
| <i>Pedobacter</i><br>(HP3C/LB-S35)        | 139 | 284735  | 5974156 | 38.41 | 91377  | 45790  | 19 | 41 | 0 |
| <i>Pedobacter</i><br>(HP3Q1/LB-S36)       | 96  | 438734  | 5124477 | 38.09 | 134171 | 70880  | 11 | 24 | 0 |
| <i>Pedobacter</i><br>(HP3S/LB-S37)        | 132 | 633395  | 5175166 | 39.08 | 331795 | 161592 | 6  | 12 | 0 |
| <i>Pedobacter</i><br>(HP6J/LB-S38)        | 80  | 636287  | 5365052 | 38.66 | 213539 | 150054 | 8  | 16 | 0 |
| <i>Pseudomonas</i><br>(CC7Q/LB-S39)       | 27  | 1296146 | 5900904 | 62.26 | 796000 | 349372 | 3  | 6  | 0 |
| <i>Serratia</i><br>(CC9C/LB-S41)          | 34  | 512688  | 4656537 | 54.02 | 305391 | 229367 | 6  | 10 | 0 |
| <i>Sphingomonas</i><br>(HP4T/LB-S42)      | 25  | 714119  | 4064073 | 66.37 | 410677 | 169571 | 4  | 8  | 0 |
| <i>Sphingomonas</i><br>(HP5L/LB-S43)      | 13  | 1159454 | 3755240 | 67.37 | 782816 | 339697 | 2  | 4  | 0 |
| <i>Sphingomonas</i><br>(HP7F/LB-S44)      | 15  | 1531233 | 4237281 | 67.67 | 743928 | 209334 | 2  | 5  | 0 |
| <i>Sphingomonas</i><br>(HP7Q/LB-S45)      | 27  | 754655  | 4255872 | 66.14 | 455590 | 160645 | 4  | 8  | 0 |
| <i>Sphingomonas</i><br>(HP9M/LB-S46)      | 41  | 496844  | 4036398 | 66.43 | 206638 | 112508 | 7  | 14 | 0 |
| <i>Stenotrophomonas</i><br>(CC4G1/LB-S47) | 19  | 1581745 | 4211189 | 66.88 | 457696 | 391294 | 3  | 5  | 0 |
| <i>Streptomyces</i><br>(CC3C/LB-S48)      | 88  | 1022433 | 8897001 | 71.47 | 284754 | 122446 | 10 | 21 | 0 |
| <i>Streptomyces</i><br>(CC6O/LB-S50)      | 98  | 524522  | 8517904 | 72.11 | 185866 | 116188 | 14 | 29 | 0 |
