# Supplementary material for: Comparative genomics of bacteria from amphibian skin associated with inhibition of an amphibian fungal pathogen, Batrachochytrium dendrobatidis
Source: PeerJ journal article supplement (doi:10.7717/peerj.15714), 2023-08-22
Supplement: Supplemental_Table_3.pdf [file Supplemental_Table_3.pdf]

Supplemental Table 3: Summary of 40 bacterial isolates from amphibian skin. Bd inhibition values range from 100 (total inhibition of Bd growth in *in vitro* assay), to 0 (no inhibition), with a few negative values indicative of potential Bd growth facilitation. Table contains the genus/sequence ID, Bd inhibition score as well as the amphibian host. The fourth column contains information about the presence of predicted terpene (T), siderophore (S) and type III polyketide synthase (P) biosynthetic gene clusters (BGCs). If the isolate did not contain a terpene, siderophore or type III polyketide synthase BGC the cell was given a value of NA.

| <b>Bacterial genus<br/>(Sample<br/>ID/Sequencing ID)</b> | <b>Bd Inhibition</b> | <b>Amphibian host</b> | <b>BGCs</b> |
|----------------------------------------------------------|----------------------|-----------------------|-------------|
| <i>Agrobacterium</i><br>(HP11E/LB-S02)                   | 91                   | Spring Peeper         | T/S         |
| <i>Agrobacterium</i><br>(HP5J1/LB-S04)                   | 10                   | Spring Peeper         | T/S         |
| <i>Bacillus</i><br>(CC6U/LB-S05)                         | 8                    | American Toad         | T/S/P       |
| <i>Bacillus</i><br>(HP5F1/LB-S06)                        | 90                   | Spring Peeper         | T/S/P       |
| <i>Bacillus</i><br>(HP5K2/LB-S07)                        | 15                   | Spring Peeper         | T/S/P       |
| <i>Bacillus</i><br>(PRE21G/LB-S08)                       | -8                   | Eastern Newt          | T/S/P       |
| <i>Flavobacterium</i><br>(CC8A2/LB-S09)                  | 58                   | American Toad         | T/P         |
| <i>Flavobacterium</i><br>(HP3BB/LB-S10)                  | 62                   | Spring Peeper         | T           |
| <i>Flavobacterium</i><br>(HP3M/LB-S11)                   | 92                   | Spring Peeper         | T           |
| <i>Hafnia</i><br>(BFE23D/LB-S12)                         | 85                   | Bullfrog              | S           |
| <i>Hafnia</i><br>(BFE501/LB-S13)                         | 94                   | Bullfrog              | S           |

|                                             |     |               |       |
|---------------------------------------------|-----|---------------|-------|
| <i>Hafnia</i><br>(PRE11D1/LB-S14)           | 82  | Eastern Newt  | S     |
| <i>Hafnia</i><br>(PRE7B/LB-S15)             | 94  | Eastern Newt  | S     |
| <i>Hafnia</i><br>(PRE7G/LB-S16)             | 99  | Eastern Newt  | S     |
| <i>Janthinobacterium</i><br>(CC11P/LB-S20)  | 98  | American Toad | T     |
| <i>Janthinobacterium</i><br>(CC130/LB-S21)  | 57  | American Toad | T/S   |
| <i>Janthinobacterium</i><br>(HP12P2/LB-S22) | 100 | Spring Peeper | T     |
| <i>Janthinobacterium</i><br>(CC14D/LB-S23)  | 36  | American Toad | T     |
| <i>Massilia</i><br>(HP1M/LB-S27)            | 100 | Spring Peeper | T     |
| <i>Massilia</i><br>(HP4P/LB-S28)            | 96  | Spring Peeper | T     |
| <i>Massilia</i><br>(HP6N/LB-S29)            | 83  | Spring Peeper | T/P   |
| <i>Microbacterium</i><br>(CC8G/LB-S30)      | -21 | American Toad | T/P   |
| <i>Microbacterium</i><br>(CC3Q/LB-S31)      | 4   | American Toad | T/P   |
| <i>Microbacterium</i><br>(HP3T/LB-S32)      | 100 | Spring Peeper | T/P   |
| <i>Microbacterium</i><br>(HP4V/LB-S33)      | 97  | Spring Peeper | T/P   |
| <i>Pedobacter</i><br>(HP10H/LB-S34)         | 81  | Spring Peeper | T/P   |
| <i>Pedobacter</i><br>(HP3C/LB-S35)          | -2  | Spring Peeper | T/S/P |

|                                           |     |               |       |
|-------------------------------------------|-----|---------------|-------|
| <i>Pedobacter</i><br>(HP3Q/LB-S36)        | 6   | Spring Peeper | T/P   |
| <i>Pedobacter</i><br>(HP3S/LB-S37)        | -18 | Spring Peeper | T/S/P |
| <i>Pedobacter</i><br>(HP6J/LB-S38)        | 100 | Spring Peeper | T/S/P |
| <i>Pseudomonas</i><br>(CC7Q/LB-S39)       | 51  | American Toad | NA    |
| <i>Serratia</i><br>(CC9C/LB-S41)          | 81  | American Toad | T     |
| <i>Sphingomonas</i><br>(HP4T/LB-S42)      | -2  | Spring Peeper | T/P   |
| <i>Sphingomonas</i><br>(HP5L/LB-S43)      | -9  | Spring Peeper | T/P   |
| <i>Sphingomonas</i><br>(HP7F/LB-S44)      | 93  | Spring Peeper | T/P   |
| <i>Sphingomonas</i><br>(HP7Q/LB-S45)      | -30 | Spring Peeper | T/P   |
| <i>Sphingomonas</i><br>(HP9M/LB-S46)      | -11 | Spring Peeper | T/P   |
| <i>Stenotrophomonas</i><br>(CC4G1/LB-S47) | 73  | American Toad | NA    |
| <i>Streptomyces</i><br>(CC3C/LB-S48)      | 1   | American Toad | T/S/P |
| <i>Streptomyces</i><br>(CC6O/LB-S50)      | 31  | American Toad | T/S/P |
